# Supplementary material for: Ascorbic acid functionalized anti-aggregated Au nanoparticles for ultrafast MEF and SERS detection of tartrazine: an ultra-wide piecewise linear range study
Source: Royal Society of Chemistry journal article supplement (doi:10.1039/d1an02139g), 2021-12-30
Supplement: d1an02139g1.pdf [file d1an02139g1.pdf]

## Electronic Supplementary Information

### **Ascorbic Acid Functionalized Anti-Aggregated Au Nanoparticles for Ultrafast MEF and SERS Detection of Tartrazine: An Ultra-Wide Piecewise Linear Range Study**

Mengru Li, Ran Li\*, Bo Han, Haojie Ma, Xueyan Hou, Yulong Kang, Yuqi Zhang\*, Ji-Jiang Wang

Key Laboratory of New Energy & New Functional Materials, Shaanxi Key Laboratory of Chemical Reaction Engineering, College of Chemistry and Chemical Engineering, Yan'an University, Yan'an, Shaanxi, 716000, PR China

**Corresponding author:**

**Ran Li**

E-mail: [lirandeqhd@vip.163.com](mailto:lirandeqhd@vip.163.com)

**Yuqi Zhang**

E-mail: [yqzhang@iccas.ac.cn](mailto:yqzhang@iccas.ac.cn)

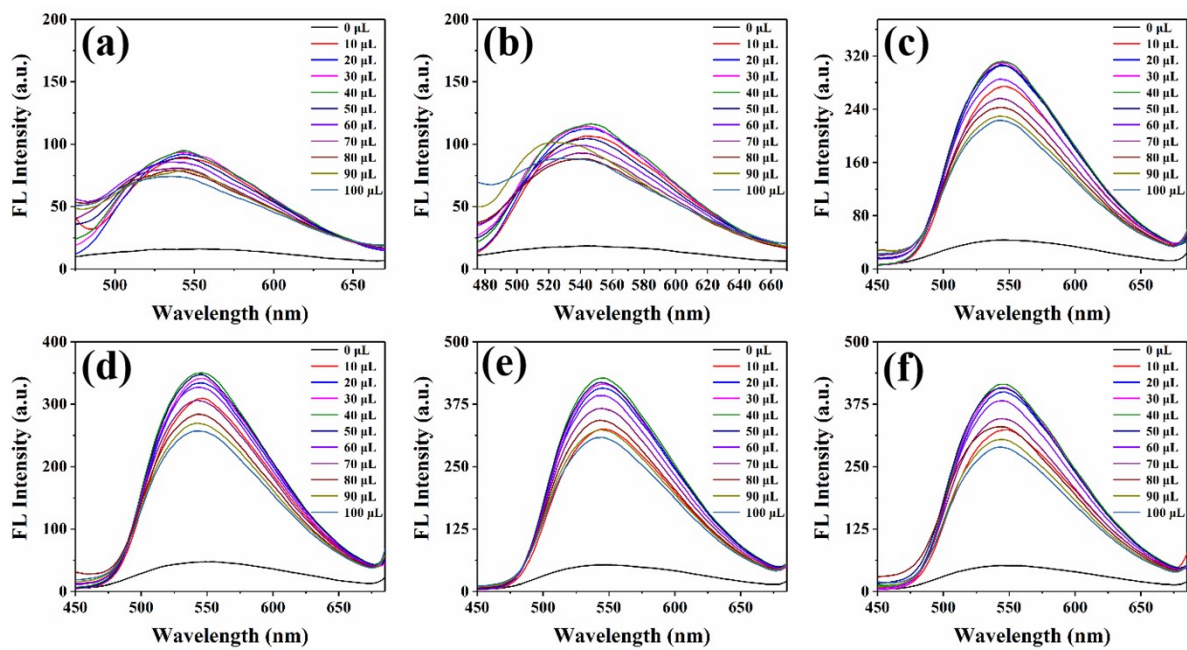

**Figure S1.** Fluorescence emission spectra of different concentrations of tartrazine solutions: (a) 8  $\mu\text{M}$ , (b) 10  $\mu\text{M}$ , (c) 40  $\mu\text{M}$ , (d) 50  $\mu\text{M}$ , (e) 70  $\mu\text{M}$ , (f) 80  $\mu\text{M}$  after adding different volumes of AuNPs.

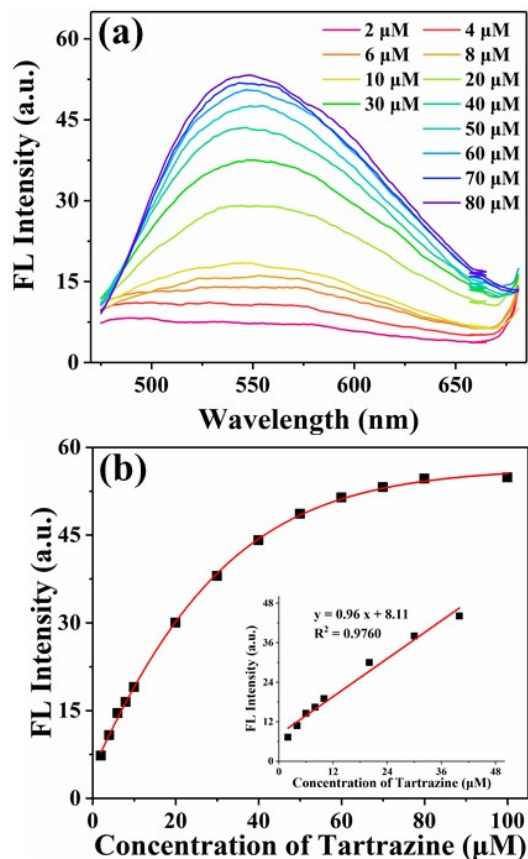

**Figure S2.** (a) Fluorescence spectra and (b) fluorescence intensity (~547 nm) of tartrazine at different concentrations without AuNPs. Inset: the line relationship between the intensity and the tartrazine concentration in the range of 2-40 μM. The limit of detection was found to be 324.8 nM.

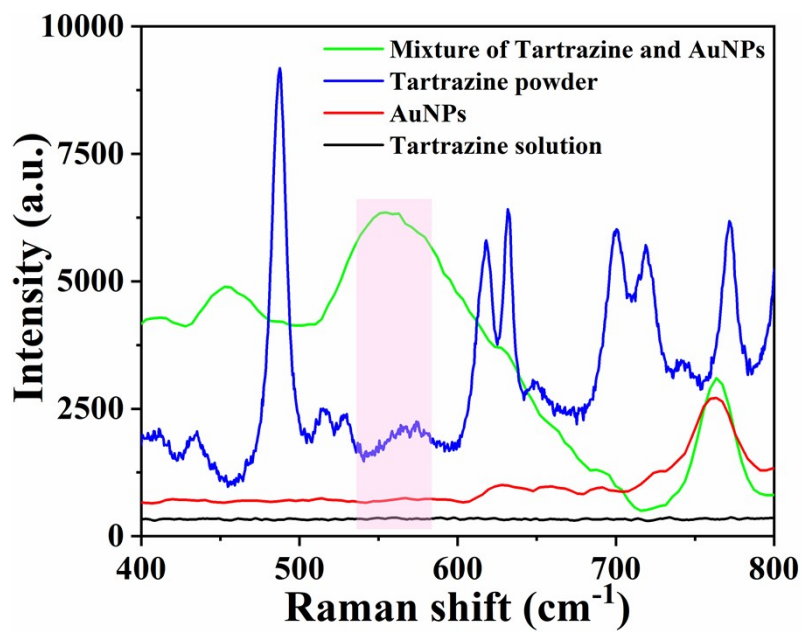

**Figure S3.** Raman spectra of tartrazine solution (black), AuNPs (red) and tartrazine powder (blue). The SERS spectrum of tartrazine ( $1.0 \times 10^{-8}$  M, green).

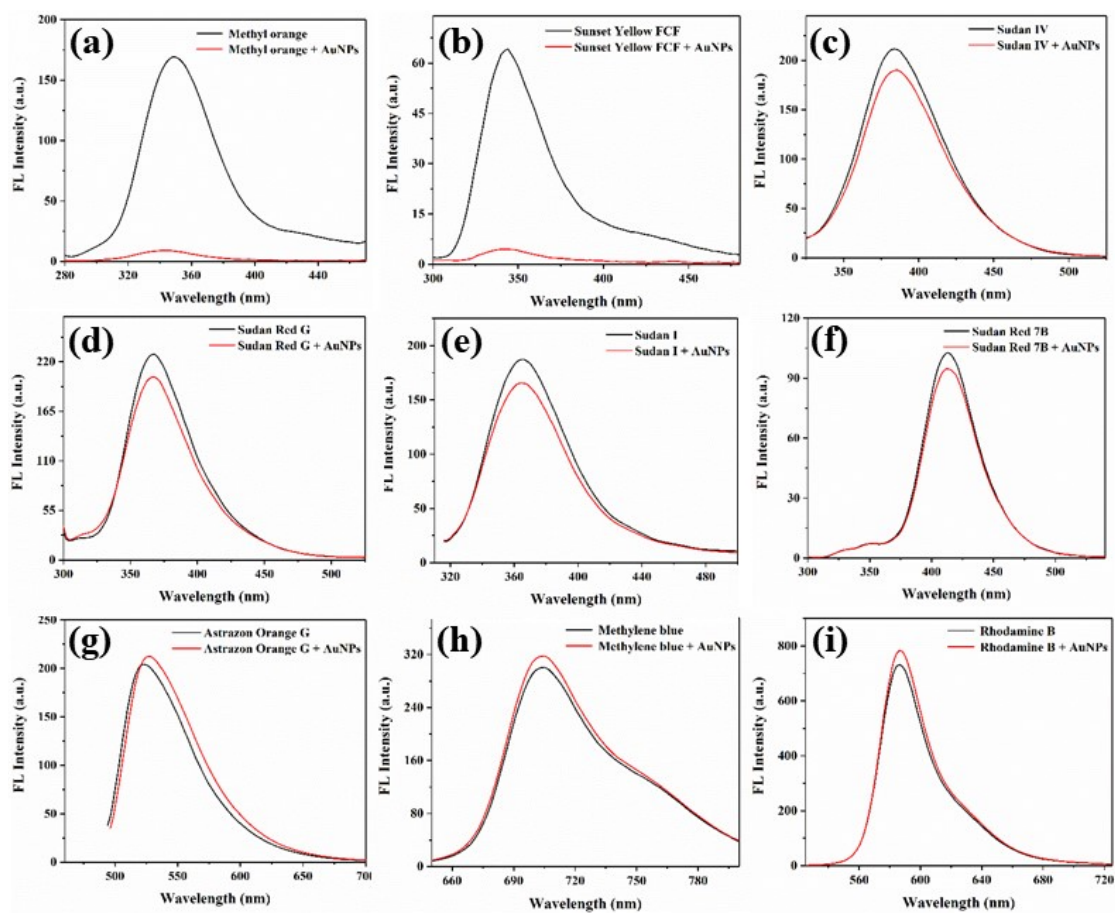

**Figure S4.** Fluorescence spectra of various compounds solutions with (red) and without (black) AuNPs.

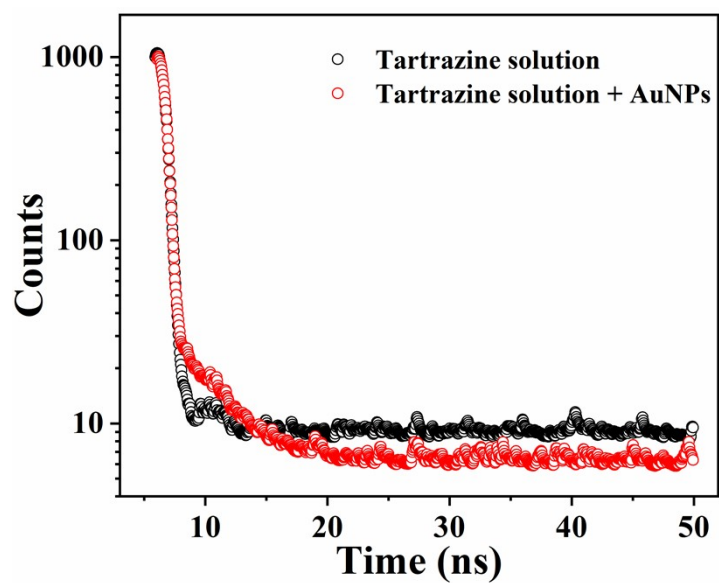

**Figure S5.** Fluorescence lifetime of tartrazine with (red) and without (black) AuNPs.

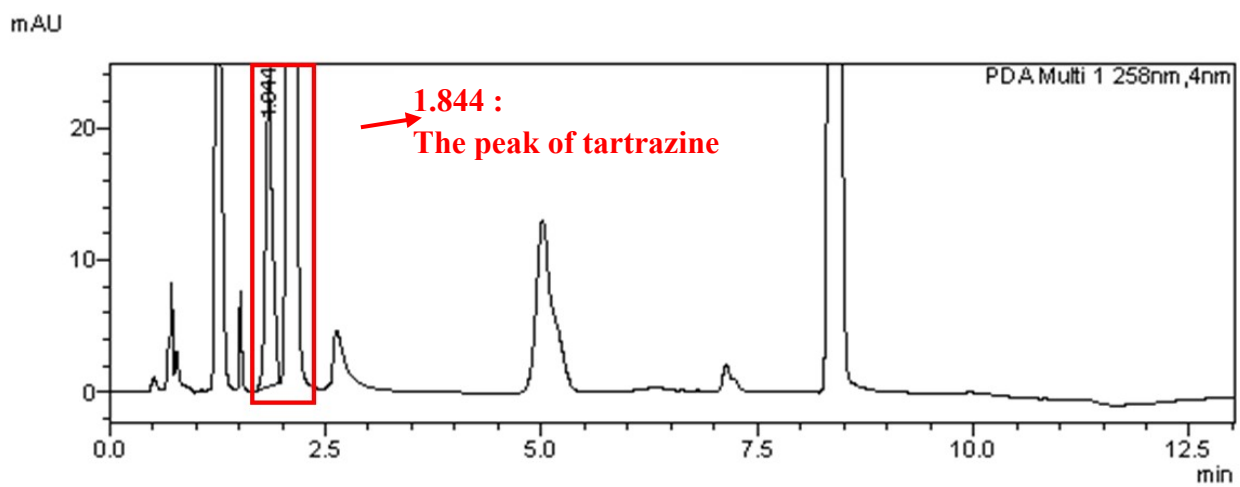

**Figure S6.** HPLC spectrum of red bull.

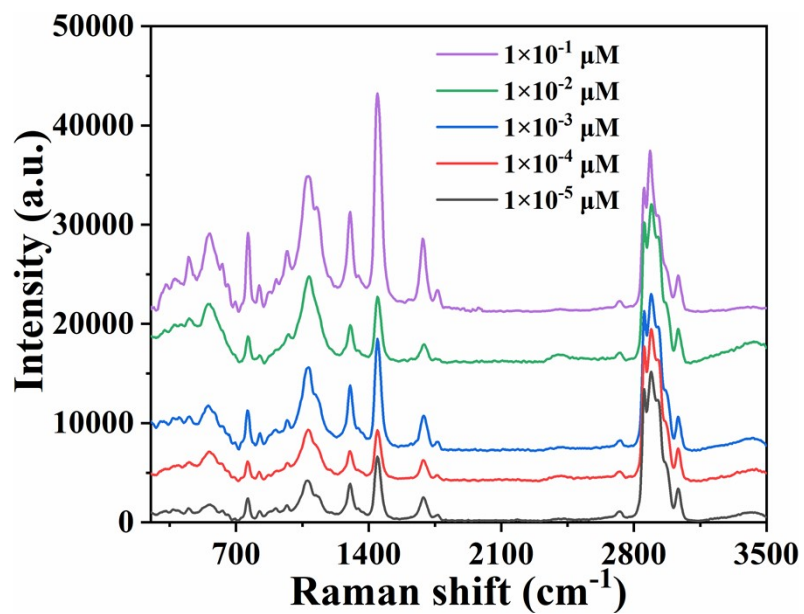

**Figure S7.** The intact SERS spectra of various concentrations of tartrazine.



**Table S1.** The RSD of SERS signals for various concentrations of tartrazine.

| <b>Concentration of tartrazine (<math>\mu\text{M}</math>)</b> | <b>RSD</b> |
|---------------------------------------------------------------|------------|
| $1.0 \times 10^{-1}$                                          | 2.15       |
| $1.0 \times 10^{-2}$                                          | 0.69       |
| $1.0 \times 10^{-3}$                                          | 0.78       |
| $1.0 \times 10^{-4}$                                          | 4.34       |
| $1.0 \times 10^{-5}$                                          | 4.28       |

**Table S2.** Comparison of various methods and proposed method.

| <b>Probe</b>          | <b>Method</b>     | <b>Linear range(<math>\mu\text{M}</math>)</b> | <b>LoD (nM)</b> | <b>Reference</b>  |
|-----------------------|-------------------|-----------------------------------------------|-----------------|-------------------|
| deep eutectic solvent | UV-vis            | 0.47-4.87*                                    | 157.197*        | [S <sup>1</sup> ] |
| ODT column            | RP-HPLC           | 4.7-75*                                       | 78.5987*        | [S <sup>2</sup> ] |
| Cl/CBPCE              | CV/LSV            | 0.037-1.38*                                   | 19              | [S <sup>3</sup> ] |
| pMe/GCE               | CV                | 5-500                                         | 970             | [S <sup>4</sup> ] |
| rGO/NiBTC/SPCEs       | DPV               | 0.075-5.0                                     | 50              | [S <sup>5</sup> ] |
| silver nanoflowers    | SERS              | 0.01-100                                      | 10*             | [S <sup>6</sup> ] |
| Ag nanowires          | SERS              | 0.019-18.71*                                  | /               | [S <sup>7</sup> ] |
| CDs                   | Fluorescence      | 0.1-0.5                                       | 26              | [S <sup>8</sup> ] |
| BSA-NiNCs             | Fluorescence      | 0.01-3.5                                      | 4               | [S <sup>9</sup> ] |
| AuNPs                 | Fluorescence/SERS | 2-40/10 <sup>-5</sup> -0.1                    | 15.4/0.0008     | This work         |

\*The data were obtained by unit conversion.

**Table S3.** The quantum yield and fluorescence lifetime for tartrazine with and without AuNPs.

| <b>Sample</b>               | <b><math>\tau_1</math> (ns)</b> | <b>%</b> | <b><math>\tau_2</math> (ns)</b> | <b>%</b> | <b><math>\tau</math> (ns)</b> |
|-----------------------------|---------------------------------|----------|---------------------------------|----------|-------------------------------|
| Tartrazine solution         | 0.15                            | 93.14    | 2.78                            | 6.86     | 0.33                          |
| Tartrazine solution + AuNPs | 0.16                            | 91.58    | 3.37                            | 9.42     | 0.43                          |

**Table S4.** Detection of tartrazine concentration in drinks by Standard additions method (n=3).

| <b>Samples</b> | <b>Detected(<math>\mu\text{M}</math>)</b> | <b>Added(<math>\mu\text{M}</math>)</b> | <b>Found(<math>\mu\text{M}</math>)</b> | <b>Recovery(%)</b> | <b>RSD</b> |
|----------------|-------------------------------------------|----------------------------------------|----------------------------------------|--------------------|------------|
| 1              | 0.0                                       | 20.0                                   | 22.1                                   | $110.9 \pm 0.1$    | 0.1        |
|                |                                           | 40.0                                   | 37.8                                   | $94.7 \pm 0.2$     | 0.2        |
| 2              | 0.0                                       | 20.0                                   | $22.2 \pm 0.1$                         | $111.6 \pm 0.6$    | 0.6        |
|                |                                           | 40.0                                   | 37.7                                   | $94.5 \pm 0.2$     | 0.2        |
| 3              | 0.0                                       | 20.0                                   | $110.9 \pm 0.2$                        | $110.9 \pm 0.2$    | 0.2        |
|                |                                           | 40.0                                   | 37.7                                   | $94.4 \pm 0.1$     | 0.1        |

## REFERENCES

- S1 M. Soyak and F. Uzcan, *J. Iran. Chem. Soc.*, 2020, **17**, 461–467.
- S2 R. Li, Y. Wang, J. Tan, S.-H. Tang, Z.-T. Jiang, S. Di and Y. Geng, *Arab. J. Chem.*, 2020, **13**, 3875–3881.
- S3 O. I. Lipskikh, E. I. Korotkova, J. Barek, V. Vyskocil, M. Saqib and E. P. Khristunova, *Talanta*, 2020, **218**, 121136.
- S4 S. Wu, Z.-Z. Yin, X. Chen, X. Wang, D. Wu and Y. Kong, *Food Chem.*, 2020, **333**, 127532–127538.
- S5 J.-H. Wu and H.-L. Lee, *Microchem. J.*, 2020, **158**, 105133–105138.
- S6 Y. Ai, P. Liang, Y. Wu, Q. Dong, J. Li, Y. Bai, B.-J. Xu, Z. Yu and D. Ni, *Food Chem.*, 2018, **241**, 427–433.
- S7 J. Song, Y. Zhang, Y. Huang, Y. Fan and K. Lai, *Nanomaterials*, 2018, **8**, 967–975.
- S8 S. Thulasi, A. Kathiravan and M. Asha Jhonsi, *ACS Omega*, 2020, **5**, 7025–7031.
- S9 Y. Wang, Y. Mu, J. Hu, Q. Zhuang and Y. Ni, *Spectrochim. Acta. A. Mol. Biomol. Spectrosc.*, 2019, **214**, 445–450.
